# Supplementary material for: Lenient rate control versus strict rate control for atrial fibrillation: a protocol for the Danish Atrial Fibrillation (DanAF) randomised clinical trial
Source: PubMed Central journal article supplement — BMJ Open. 2021 Mar 31;11(3):e044744. doi: 10.1136/bmjopen-2020-044744 (PMC8016086; doi:10.1136/bmjopen-2020-044744), 2021-03-31
Supplement: bmjopen-2020-044744supp002.pdf [file bmjopen-2020-044744supp002.pdf]

|                                                  |                                                                                                                                                                                                                                                                                                                                                                                                                                                                                                                                                                                                                                                                                                                                                                                                              |
|--------------------------------------------------|--------------------------------------------------------------------------------------------------------------------------------------------------------------------------------------------------------------------------------------------------------------------------------------------------------------------------------------------------------------------------------------------------------------------------------------------------------------------------------------------------------------------------------------------------------------------------------------------------------------------------------------------------------------------------------------------------------------------------------------------------------------------------------------------------------------|
|                                                  |                                                                                                                                                                                                                                                                                                                                                                                                                                                                                                                                                                                                                                                                                                                                                                                                              |
| Data category                                    | Trial information                                                                                                                                                                                                                                                                                                                                                                                                                                                                                                                                                                                                                                                                                                                                                                                            |
| 1. Primary registry and trial identifying number | Clinicaltrials.gov (NCT04542785)                                                                                                                                                                                                                                                                                                                                                                                                                                                                                                                                                                                                                                                                                                                                                                             |
| 2. Date of Registration in Primary Registry      | September 2020                                                                                                                                                                                                                                                                                                                                                                                                                                                                                                                                                                                                                                                                                                                                                                                               |
| 3. Secondary Identifying Numbers                 | Region Zealand Ethics committee ID: SJ-797<br>Internal ID number Region Zealand: REG-078-2019                                                                                                                                                                                                                                                                                                                                                                                                                                                                                                                                                                                                                                                                                                                |
| 4. Source(s) of Monetary or Material Support     | Holbaek University Hospital<br>Odense University Hospital<br>Hvidovre University Hospital<br>Region Zealand University Hospital - Roskilde<br>Region of Southern Denmark and Region Zealand joint research fund 2018<br>The Danish Heart foundation grant number 19-R134-A8959-22123<br>The University of Southern Denmark<br>A.P. Moeller Foundation                                                                                                                                                                                                                                                                                                                                                                                                                                                        |
| 5. Primary Sponsor                               | Holbaek Hospital<br>Smedelundsgade 60,<br>4300 Holbaek Hospital<br>Denmark                                                                                                                                                                                                                                                                                                                                                                                                                                                                                                                                                                                                                                                                                                                                   |
| 6. Secondary Sponsor(s)                          |                                                                                                                                                                                                                                                                                                                                                                                                                                                                                                                                                                                                                                                                                                                                                                                                              |
| 7. Contact for Public Queries                    | JBF                                                                                                                                                                                                                                                                                                                                                                                                                                                                                                                                                                                                                                                                                                                                                                                                          |
| 8. Contact for Scientific Queries                | JBF                                                                                                                                                                                                                                                                                                                                                                                                                                                                                                                                                                                                                                                                                                                                                                                                          |
| 9. Public Title                                  | Lenient rate control versus strict rate control for atrial fibrillation. The Danish Atrial Fibrillation (DanAF) randomised clinical trial                                                                                                                                                                                                                                                                                                                                                                                                                                                                                                                                                                                                                                                                    |
| 10. Scientific Title                             | Lenient rate control versus strict rate control for atrial fibrillation. The Danish Atrial Fibrillation (DanAF) randomised clinical trial                                                                                                                                                                                                                                                                                                                                                                                                                                                                                                                                                                                                                                                                    |
| 11. Countries of Recruitment                     | Denmark                                                                                                                                                                                                                                                                                                                                                                                                                                                                                                                                                                                                                                                                                                                                                                                                      |
| 12. Health Condition(s) or Problem(s) Studied    | Atrial Fibrillation                                                                                                                                                                                                                                                                                                                                                                                                                                                                                                                                                                                                                                                                                                                                                                                          |
| 13. Intervention(s)                              | Lenient rate control versus strict rate control                                                                                                                                                                                                                                                                                                                                                                                                                                                                                                                                                                                                                                                                                                                                                              |
| 14. Key Inclusion and Exclusion Criteria         | Inclusion criteria: 1. Atrial fibrillation (ECG-confirmed and diagnosed by the treating physician) persistent (defined as atrial fibrillation for more than 7 days) and permanent atrial fibrillation (only rate control is considered going forward); 2. Rate control must be accepted as being the primary management strategy going forward. 3. Informed consent; 4. Adult (18 years or older). Exclusion criteria: 1. No informed consent; 2. Initial heart rate under 80 bpm at rest (assessed via an electrocardiogram (ECG) before randomisation); 3. Less than 3 weeks of anticoagulation with NOAC or 4 weeks with efficient warfarin; 4. Participants dependent on a high ventricular rate to maintain a sufficient cardiac output. This will be based on an individual assessment of the possible |

|                              |                                                                                                                                                                                                                                      |
|------------------------------|--------------------------------------------------------------------------------------------------------------------------------------------------------------------------------------------------------------------------------------|
|                              | participant. 5. Participants who are hemodynamic unstable and therefore require immediate conversion.                                                                                                                                |
| 15. Study Type               | 1. Interventional study<br>2. Method of allocation: Randomised<br>Masking: Participant and outcome assessors blinded<br>Assignment: parallel<br>Primary purpose: Comparing two strategies                                            |
| 16. Date of First Enrollment | Anticipated end of January 2021.                                                                                                                                                                                                     |
| 17. Sample Size              | 350 planned, 0 enrolled.                                                                                                                                                                                                             |
| 18. Recruitment Status       | Pending                                                                                                                                                                                                                              |
| 19. Primary Outcome(s)       | Short Form-36 (SF-36) questionnaire (physical component score).                                                                                                                                                                      |
| 20. Key Secondary Outcomes   | Secondary outcomes will be days alive outside hospital, symptom control using the Atrial Fibrillation Effect on Quality of Life, quality of life using the SF-36 questionnaire (mental component score), and serious adverse events. |
| 21. Ethics Review            | Approved on 30.10.2019 by The Ethics committee in Region Zealand. Alléen 15, 4180 Soroe. Telephone number: 57 87 52 83                                                                                                               |
| 22. Completion Date          | Anticipated completion date January 2026                                                                                                                                                                                             |
| 23. Summary Results          | Not yet available                                                                                                                                                                                                                    |
| 24. IPD Sharing Statement    | Plan to Share IPD: Yes                                                                                                                                                                                                               |
