# Supplementary material for: Lenient rate control versus strict rate control for atrial fibrillation: a protocol for the Danish Atrial Fibrillation (DanAF) randomised clinical trial
Source: PubMed Central journal article supplement — BMJ Open. 2021 Mar 31;11(3):e044744. doi: 10.1136/bmjopen-2020-044744 (PMC8016086; doi:10.1136/bmjopen-2020-044744), 2021-03-31
Supplement: bmjopen-2020-044744supp004.pdf [file bmjopen-2020-044744supp004.pdf]

## Supplementary file 4 - biobank

We will further collect blood samples for a research biobank and measure: Nt-proBNP, hsCRP, hsTni, GDF-15, IL6, Cystatin-C, YKL40, suPAR and Fibulin-1. Due to the manner of which these analysis have to be analysed and the variations in the measurement depending on blood sample kit is used, blood samples will be collected at the first visit, after 6 months, and at follow-up after 1 year and analysed together. Follow up after two and three years will be analysed together. These analyses will require 10 mL of blood per collection. The blood samples are expected to be analysed either at a laboratory in Sweden or a laboratory in Denmark, but may end up being analysed in another EU country. The storage of data will abide by the Danish General Data Protection Regulation and the Danish Data Protection Act in Denmark.

Any spare blood that is collected will be stored in a biobank in Denmark for future unspecified research purposes. The storage of data will still abide by the Danish General Data Protection Regulation and the Danish Data Protection Act in Denmark.

In addition to the above blood samples, we will collect three different types of blood samples: 7 ml. serum, 7 ml plasma and 7 ml citrat plasma to be stored for future research. This will total approximately 31 mL of blood. The blood samples are expected to be analysed either at a laboratory in Sweden or a laboratory in Denmark, but may end up being analysed in another EU country. Participants will be given separate information on this blood collection as well as be required to give a separate informed consent.

The storage of data will abide by the Danish General Data Protection Regulation and the Danish Data Protection Act in Denmark.
