# Supplementary material for: Lenient rate control versus strict rate control for atrial fibrillation: a protocol for the Danish Atrial Fibrillation (DanAF) randomised clinical trial
Source: PubMed Central journal article supplement — BMJ Open. 2021 Mar 31;11(3):e044744. doi: 10.1136/bmjopen-2020-044744 (PMC8016086; doi:10.1136/bmjopen-2020-044744), 2021-03-31
Supplement: bmjopen-2020-044744supp005.pdf [file bmjopen-2020-044744supp005.pdf]

### **Supplementary file 5 – Power estimations of secondary outcomes**

The below power calculations are based on a sample size of 350 participants as specified in the main document.

#### **Days alive outside hospital**

Using a minimal important difference of 3 days, a standard deviation of 9, a risk of type I error of 5%, and accounting for the fact that the data is expected not to be normal distributed, we will be able to reject the null hypothesis that the population means of the experimental and control groups are equal with probability (power) of 82.1%.<sup>1</sup>

#### **The Atrial Fibrillation Effect on Quality-of-Life (AFEQT)**

In previous trials the observed difference between groups was normally distributed with a standard deviation of 21.<sup>2,3</sup> Using a minimal important difference of 7, we will be able to reject the null hypothesis that the population means of the experimental and control groups are equal with probability (power) of 87.5%. The Type I error probability associated with this test of this null hypothesis is 5%.

#### **Quality of life using the SF-36 questionnaire (mental component score)**

In previous trials the observed difference between groups was normally distributed with a standard deviation 10.<sup>4-6</sup> Using a minimal important difference of 4, we will be able to reject the null hypothesis that the population means of the experimental and control groups are equal with probability (power) of 96%. The Type I error probability associated with this test of this null hypothesis is 5%.

#### **Serious adverse events**

We anticipate a failure rate among control of 20%. If we anticipate a relative risk reduction of 60%, we will be able to reject the null hypothesis with probability (power) of 90.2%. The Type I error probability associated with this test of this null hypothesis is 5%.

## **POWER ESTIMATIONS OF EXPLORATORY OUTCOMES**

### **All-cause mortality**

Prior data indicate that the mortality rate among controls is about 5%.<sup>7</sup> If we anticipate a relative risk reduction of 10%, we will be able to reject the null hypothesis with probability (power) of 5.7%. The Type I error probability associated with this test of this null hypothesis is 5%.

### **Composite of all-cause mortality, stroke, myocardial infarction and cardiac arrest**

Prior data indicate that this outcome occurs in controls in about 8%.<sup>7,8</sup> If we anticipate a relative risk reduction of 10%, we will be able to reject the null hypothesis with probability (power) of 5.9%. The Type I error probability associated with this test of this null hypothesis is 5%.

### **Cardiac mortality**

Prior data indicate that the failure rate among controls is 3.9%.<sup>7</sup> If we anticipate a relative risk reduction of 10%, we will be able to reject the null hypothesis with probability (power) of 5.4%. The Type I error probability associated with this test of this null hypothesis is 5%.

### **Stroke**

Prior data indicate that cardiac mortality among controls is 3.9%.<sup>7</sup> If we anticipate a relative risk reduction of 10%, we will be able to reject the null hypothesis with probability (power) of 5.4%. The Type I error probability associated with this test of this null hypothesis is 5%.

### **Hospitalisation for worsening of heart failure**

Prior data indicate that heart failure among controls is 27.4%.<sup>7</sup> If we anticipate a relative risk reduction of 10%, we will be able to reject the null hypothesis with probability (power) of 9.0%. The Type I error probability associated with this test of this null hypothesis is 5%.

### Number of hospital admissions

Prior data indicate that number of participant who are hospitalised is 27.4%.<sup>7</sup> If we anticipate a relative risk reduction of 10%, we will be able to reject the null hypothesis with probability (power) of 9%. The Type I error probability associated with this test of this null hypothesis is 5%.

### Six-minute walking distance

In previous trials the observed difference between groups was normally distributed with a standard deviation 75.<sup>9-11</sup> Using a minimal important difference of 40, we will be able to reject the null hypothesis that the population means of the experimental and control groups are equal with probability (power) of 99.9%. The Type I error probability associated with this test of this null hypothesis is 5%.

### Physical activity using trial accelerometer

Prior data indicates that the standard deviation among groups was 65 minutes pr. Day when measuring sedentary behaviour. Assuming a difference in groups of 20 minutes/day, we will be able to reject the null hypothesis with a probability of 81.9%. The type 1 error probability associated with this test of this null hypothesis is 5%.<sup>12 13</sup>

1. Jakobsen JC, Tamborrino M, Winkel P, et al. Count Data Analysis in Randomised Clinical Trials. *J Biomet Biostat* 6 2015;227 doi: 10.4172/2155-6180.1000227
2. Holmes DN, Piccini JP, Allen LA, et al. Defining Clinically Important Difference in the Atrial Fibrillation Effect on Quality-of-Life Score. *Circ Cardiovasc Qual Outcomes* 2019;12(5):e005358. doi: 10.1161/circoutcomes.118.005358 [published Online First: 2019/05/17]
3. Mark DB, Anstrom KJ, Sheng S, et al. Effect of Catheter Ablation vs Medical Therapy on Quality of Life Among Patients With Atrial Fibrillation: The CABANA Randomized Clinical Trial. *Jama* 2019;321(13):1275-85. doi: 10.1001/jama.2019.0692 [published Online First: 2019/03/16]
4. Wokhlu A, Monahan KH, Hodge DO, et al. Long-term quality of life after ablation of atrial fibrillation the impact of recurrence, symptom relief, and placebo effect. *J Am Coll Cardiol* 2010;55(21):2308-16. doi: 10.1016/j.jacc.2010.01.040 [published Online First: 2010/05/22]
5. Groenveld HF, Crijns HJ, Van den Berg MP, et al. The effect of rate control on quality of life in patients with permanent atrial fibrillation: data from the RACE II (Rate Control Efficacy in Permanent Atrial Fibrillation II) study. *J Am Coll Cardiol* 2011;58(17):1795-803. doi: 10.1016/j.jacc.2011.06.055 [published Online First: 2011/10/15]

6. Dorian P, Paquette M, Newman D, et al. Quality of life improves with treatment in the Canadian Trial of Atrial Fibrillation. *Am Heart J* 2002;143(6):984-90. [published Online First: 2002/06/21]
7. Van Gelder IC, Groenveld HF, Crijns HJGM, et al. Lenient versus Strict Rate Control in Patients with Atrial Fibrillation. *New England Journal of Medicine* 2010;362(15):1363-73. doi: 10.1056/NEJMoa1001337
8. Kirchhof P, Breithardt G, Camm AJ, et al. Improving outcomes in patients with atrial fibrillation: Rationale and design of the Early treatment of Atrial fibrillation for Stroke prevention Trial. *American Heart Journal* 2013;166(3):442-48. doi: <https://doi.org/10.1016/j.ahj.2013.05.015>
9. Passantino A, Lagiòia R, Mastropasqua F, et al. Short-Term Change in Distance Walked in 6 Min Is an Indicator of Outcome in Patients With Chronic Heart Failure in Clinical Practice. *Journal of the American College of Cardiology* 2006;48(1):99-105. doi: <https://doi.org/10.1016/j.jacc.2006.02.061>
10. Silvet H, Hawkins LA, Jacobson AK. Heart rate control in patients with chronic atrial fibrillation and heart failure. *Congest Heart Fail* 2013;19(1):25-8. doi: 10.1111/j.1751-7133.2012.00309.x [published Online First: 2012/09/11]
11. Ding L, Quan X-Q, Zhang S, et al. Correlation between impedance cardiography and 6 min walk distance in atrial fibrillation patients. *BMC Cardiovascular Disorders* 2016;16:133. doi: 10.1186/s12872-016-0297-0
12. Bellettiere J, LaMonte MJ, Evenson KR, et al. Sedentary behavior and cardiovascular disease in older women: The Objective Physical Activity and Cardiovascular Health (OPACH) Study. *Circulation* 2019;139(8):1036-46. doi: 10.1161/CIRCULATIONAHA.118.035312
13. Andersson C, Lyass A, Larson Martin G, et al. Physical Activity Measured by Accelerometry and its Associations With Cardiac Structure and Vascular Function in Young and Middle-Aged Adults. *Journal of the American Heart Association*;4(3):e001528. doi: 10.1161/JAHA.114.001528
