# Supplementary material for: Lenient rate control versus strict rate control for atrial fibrillation: a protocol for the Danish Atrial Fibrillation (DanAF) randomised clinical trial
Source: PubMed Central journal article supplement — BMJ Open. 2021 Mar 31;11(3):e044744. doi: 10.1136/bmjopen-2020-044744 (PMC8016086; doi:10.1136/bmjopen-2020-044744), 2021-03-31
Supplement: bmjopen-2020-044744supp007.pdf [file bmjopen-2020-044744supp007.pdf]

**Supplementary file 7 – informed consent form****(S4)****Informed consent to participate in a health-related research project**

Research project title: Lenient rate control versus strict rate control for atrial fibrillation. The Danish Atrial Fibrillation (DanAF) randomised clinical trial

**Statement from trial participant:**

I have received both written and verbal information and have received enough information regarding purpose, methods, harms and benefits to give informed consent.

I know that it is voluntary to participate and that I always have the right to withdraw my consent without losing my right to treatment now or in the future.

I give my consent to participate in the research project and that my biological material may be collected with the intention of storing it in a research biobank. I have received a copy of this consent form along with written information regarding the project for my personal use.

Participant name: \_\_\_\_\_

Date: \_\_\_\_\_ Signature: \_\_\_\_\_

If during the research project significant information regarding your health, you will be informed. If you would like not to be informed of any new information regarding your health that comes to our attention during the trial, we ask that you mark here: \_\_\_\_\_ (mark with an x)

Do you wish to be informed of the results of the trial and possible consequences for you?:

Yes \_\_\_\_\_ (mark with an x)      No \_\_\_\_\_ (mark with an x)

**Statement from the person providing information to the participant:**

I declare that the participant has received written and verbal information about the trial.

To my knowledge there has been given enough information to make a decision to participate in the trial.

Printed name of the person, who has given the information:

Date: \_\_\_\_\_ Signature: \_\_\_\_\_

Regional ethics committee project identification:

69694
